# Supplementary material
Source: publisher site journal article supplement (https://www.dovepress.com/article/261318)
Supplement: Supplementary file 1 [file get_supplementary_file.php]

**Supplementary Information:**

**Appendix 1**: List of Independant Ethics Commmittees (IEC) or Institutional Review Boards (IRB) by study center

| **Center No.** | **Ethics Committee or Institutional Review Board** | **Department / Organization** | **City, State/Province, Postal Code Country** |
| --- | --- | --- | --- |
| 0101 | Western Institutional Review Board (WIRB) | NA | Puyallup Washington 98374-  2115  United States |
| 0102 | Western Institutional Review Board (WIRB) | NA | Puyallup Washington 98374-  2115  United States |
| 0104 | Western Institutional Review Board (WIRB) | NA | Puyallup Washington 98374-  2115 |
|  |  |  | United States |
| 0201 | University of Waterloo | NA | Waterloo Ontario N2L 3G1 |
|  |  |  | Canada |
| 0301 | Yorkshire & The Humber - | Holland Drive | Newcastle upon Tyne Tyne |
|  | Sheffield Research Ethics Committee |  | and Wear NE2 4NQ United Kingdom |
| 0401 | CEIC Área de Salud Valladolid Este, Hospital Clínico Universitario de Valladolid Farmacología, Facultad de | N/A | Valladolid Castilla  León 47005 Spain. |
|  | Medicina, Universidad de Valladolid  C/ Ramón y Cajal 7, sexta planta 47005 Valladolid. Spain. |  |  |

**Appendix 2:**

Grading for the quality of the meibum secretion (i.e. meibum quality score):

- Grade 0 = Normal, clear oil expressed
- Grade 1 = Opaque, diffusely turbid, normal viscosity
- Grade 2 = Opaque, increased viscosity
- Grade 3 = Inspissated (i.e. like paste) or no expressed material

Grading for expressiblility:

- 0 = all glands expressible
- 1 = 3-4 glands expressible
- 2 = 1-2 glands expressible
- 3 = no glands expressible

**Appendix 3:** Assessment of ocular discomfort using VAS scale

VAS questionnaire had two questions based on the frequency and severity of ocular discomfort

"How often, on average, your eyes felt uncomfortable over the past week?" (scale 0- rarely; 100-all the time)” and

"How uncomfortable, on average, your eyes felt over the past week?" (0-very mild; 100-very severely uncomfortable)”

For each of the question, the questionnaire had a 100 mm horizontal line with 0 and 100 indicated at respective end of the line. Patients were asked to mark an X on the line to indicate the response. VAS score was calculated by measuring the length (in mm) from the start of the line to the intersection point of the “X” mark made by the patient.
